# Supplementary material
Source: HighWire-hosted journal article supplement (https://care.diabetesjournals.org/content/suppl/2009/09/29/dc09-1235)
Supplement: dc09-1235_Online_appendix.pdf [file dc09-1235_Online_appendix.pdf]

**Table A1. Demographic and metabolic characteristics at baseline**

|                              | Overall<br>n = 2397 | ILI<br>n = 1211 | DSE<br>n = 1186 |
|------------------------------|---------------------|-----------------|-----------------|
| <b>Gender</b>                |                     |                 |                 |
| Male: Female (%)             | 41                  | 40              | 41              |
| Female (%)                   | 59                  | 60              | 59              |
| <b>Age (years)</b>           |                     |                 |                 |
| 45-55 (%)                    | 57 (6.4)            | 57 (6.6)        | 57 (7.2)        |
| 55-65 (%)                    | 43                  | 44              | 42              |
| 66-75 (%)                    | 43                  | 42              | 44              |
|                              | 14                  | 14              | 15              |
| <b>Race/ethnicity</b>        |                     |                 |                 |
| Caucasian (%)                | 65                  | 64              | 65              |
| African American (%)         | 14                  | 14              | 13              |
| Hispanic (%)                 | 13                  | 13              | 13              |
| Native American (%)          | 5                   | 5               | 5               |
| Other (%)                    | 3                   | 3               | 3               |
| Duration of Diabetes (years) | 7.2 (5.9)           | 7.2 (6.0)       | 6.5 (6.0)       |
| History of CVD (%)           | 11.5                | 11.9            | 11              |
| <b>History of Smoking</b>    |                     |                 |                 |
| Never (%)                    | 51.4                | 49.8            | 53.0            |
| Past (%)                     | 44.4                | 45.3            | 43.4            |
| Current (%)                  | 4.3                 | 4.9             | 3.6             |
| Lipid Medication Use (%)     | 43.9                | 44.7            | 43.0            |
| <b>Adiposity</b>             |                     |                 |                 |
| Weight (Kg)                  | 101.2 (19.6)        | 101.0 (19.9)    | 101.4 (19.3)    |
| BMI (Kg/m <sup>2</sup> )     | 36.1 (6.0)          | 36.0 (6.1)      | 36.2 (5.9)      |
| Waist Circumference (cm)     | 114 (14.6)          | 114 (14.8)      | 114 (14.3)      |
| <b>Glycemic Control</b>      |                     |                 |                 |
| HbA1c (%)                    | 7.4 (1.2)           | 7.4 (1.2)       | 7.4 (1.3)       |
| Glucose (mg/dl)              | 157 (47.0)          | 156 (45.3)      | 158 (48.7)      |
| <b>Lipids</b>                |                     |                 |                 |
| Total Cholesterol (mg/dl)    | 193 (37.8)          | 194 (38.1)      | 192 (37.5)      |
| Triglycerides (mg/dl)        | 186 (125.6)         | 189 (127.4)     | 182 (123.6)     |
| HDL (mg/dl)                  | 43 (11.3)           | 43 (11.2)       | 42 (11.3)       |
| LDL (mg/dl)                  | 115 (32.3)          | 115 (32.3)      | 114 (32.4)      |
| Non-HDL (mg/dl)              | 151 (37.6)          | 152 (38.0)      | 150 (37.2)      |
| Fitness (METS)*              | 5.2 (1.54)          | 5.2 (1.51)      | 5.2 (1.57)      |

ILI: Intensive lifestyle intervention; DSE: Diabetes, Support and Education; CVD: Cardiovascular Disease; S.D.: Standard Deviation. Data shown as mean (S.D.) unless otherwise specified.

\*On sub-maximal stress test

Look AHEAD changed the age eligibility criteria during the second year of recruitment to increase the anticipated cardiovascular event rate. Dietary assessment was done in the first half of enrollees, resulting in slightly mean younger age in the dietary vs. the non-dietary subgroup (57 vs. 60 years of age), a lower prevalence of CVD (11.5 vs 16%) and less use of lipid-lowering medications (43.9 vs 52.9%). There were no significant differences in gender, race/ethnicity, adiposity or fitness.

**Table A2. Marine omega-3 fatty acid intake at baseline and its association with HDL and triglyceride levels after multiple metabolic and dietary variable adjustments**

| Predictors             | Model with HDL as Outcome* |             |              | Model with log triglycerides as Outcome* |             |                  |
|------------------------|----------------------------|-------------|--------------|------------------------------------------|-------------|------------------|
|                        | B                          | SE          | p            | B                                        | SE          | p                |
| <b>mO-3FA (mg/day)</b> | <b>4.14</b>                | <b>2.12</b> | <b>0.050</b> | <b>-0.41</b>                             | <b>0.11</b> | <b>&lt;0.001</b> |
| Lipid medication use   | -0.28                      | 0.45        | 0.538        | 0.044                                    | 0.02        | 0.062            |
| HbA1c (%)              | -0.67                      | 0.18        | <0.001       | 0.066                                    | 0.01        | <0.001           |
| Weight (Kg)            | -0.04                      | 0.01        | 0.004        | 0.00                                     | 0.00        | 0.953            |
| Fitness (METS)         | -0.17                      | 0.16        | 0.292        | -0.01                                    | 0.01        | 0.207            |
| Dietary Fat (g/day)    | -0.11                      | 0.05        | 0.045        | 0.00                                     | 0.00        | 0.414            |
| Saturated Fat (g/day)  | 0.128                      | 0.07        | 0.060        | -0.01                                    | 0.00        | 0.020            |
| Linolenic Acid (g/day) | 0.11                       | 0.08        | 0.142        | -0.01                                    | 0.00        | 0.164            |
| Linoleic Acid (g/day)  | -0.88                      | 0.48        | 0.067        | 0.008                                    | 0.03        | 0.756            |
| Calories (kcal/day)    | 0.007                      | 0.05        | 0.135        | 0.00                                     | 0.00        | 0.581            |
| Carbohydrates (g/day)  | -0.04                      | 0.02        | 0.039        | 0.00                                     | 0.00        | 0.956            |
| Protein (g/day)        | -0.05                      | 0.03        | 0.056        | 0.00                                     | 0.00        | 0.809            |
| Fiber (g/day)          | 0.125                      | 0.050       | 0.012        | 0.00                                     | 0.00        | 0.184            |
| Race/ethnicity         | -                          | -           | <0.001       | -                                        | -           | <0.001           |

\*Multiple variable regression models adjust for all predictor variables listed and for age, gender and study site
